# Supplementary material for: Tobacco use in the Myeloproliferative neoplasms: symptom burden, patient opinions, and care
Source: Springer Nature journal article supplement (doi:10.1186/s12885-021-08439-7), 2021-06-10
Supplement: MOESM1 [file 19248144]

**Table S1. Alcohol, Use and Experiences by Smoking Status**

| Alcohol use and experiences ( <i>n</i> , %)                                                                | Current/Former<br>( <i>N</i> =181) | Never<br>( <i>N</i> =254) | Total<br>( <i>N</i> =435) | <i>p</i> -value |
|------------------------------------------------------------------------------------------------------------|------------------------------------|---------------------------|---------------------------|-----------------|
| Alcoholic drinks per week                                                                                  |                                    |                           |                           | 0.0164          |
| Do not drink alcohol                                                                                       | 84 (47.2%)                         | 126 (50.6%)               | 210 (49.2%)               |                 |
| 1-7 standard drinks                                                                                        | 77 (43.3%)                         | 113 (45.3%)               | 190 (44.5%)               |                 |
| 8-14 standard drinks                                                                                       | 8 (4.5%)                           | 9 (3.6%)                  | 17 (4.0%)                 |                 |
| > 14 standard drinks                                                                                       | 9 (5.1%)                           | 1 (0.4%)                  | 10 (2.3%)                 |                 |
| History of alcohol abuse                                                                                   | 13 (7.2%)                          | 2 (0.8%)                  | 15 (3.4%)                 | 0.0006          |
| Alcohol use problems                                                                                       |                                    |                           |                           |                 |
| Have you ever been told to cut back?                                                                       | 19 (10.5%)                         | 4 (1.6%)                  | 23 (5.3%)                 | <0.0001         |
| Have people annoyed you by criticizing your drinking?                                                      | 9 (5.0%)                           | 3 (1.2%)                  | 12 (2.8%)                 | 0.0329          |
| Have you ever felt bad or guilty about your drinking?                                                      | 23 (12.7%)                         | 15 (5.9%)                 | 38 (8.7%)                 | 0.0158          |
| Have you ever had a drink first thing in the morning to steady<br>your nerves or to get rid of a hangover? | 2 (1.1%)                           | 0 (0.0%)                  | 2 (0.5%)                  | 0.1726          |
| Number of alcohol use problems                                                                             |                                    |                           |                           | 0.0151          |
| 0 or 1                                                                                                     | 170 (93.9%)                        | 250 (98.4%)               | 420 (96.6%)               |                 |
| ≥ 2                                                                                                        | 11 (6.1%)                          | 4 (1.6%)                  | 15 (3.4%)                 |                 |
