# Supplementary material for: Tobacco use in the Myeloproliferative neoplasms: symptom burden, patient opinions, and care
Source: Springer Nature journal article supplement (doi:10.1186/s12885-021-08439-7), 2021-06-10
Supplement: MOESM2 [file 19248144]

**Table S2. Smoking Opinions and Care by Smoking Status**

| Patients' opinions regarding the relationship of smoking and MPN | Patients responding "Yes" (n, %) |                           |                  |
|------------------------------------------------------------------|----------------------------------|---------------------------|------------------|
|                                                                  | Current smokers<br>(N=20)        | Former smokers<br>(N=161) | Total<br>(N=181) |
| Smoking Increases Risk of Developing MPN                         | 7 (35.0%)                        | 59 (38.3%)                | 66 (37.9%)       |
| Chewing Tobacco Increases Risk of Developing MPN                 | 8 (40.0%)                        | 55 (35.5%)                | 63 (36.0%)       |
| Vaping Increases Risk of Developing MPN                          | 6 (33.3%)                        | 53 (34.6%)                | 59 (34.5%)       |
| Smoking Increases Risk of Developing Blood Clot                  | 18 (90.0%)                       | 128 (81.5%)               | 146 (82.5%)      |
| Vaping Increases Risk of Developing Blood Clot                   | 12 (60.0%)                       | 86 (56.2%)                | 98 (56.6%)       |
| Vaping Safer Than Smoking for MPN Patients                       | 3 (15.8%)                        | 54 (35.5%)                | 57 (33.3%)       |
| <b>Smoking Cessation Guidance</b>                                |                                  |                           |                  |
| Physician Discussed Tobacco Use with You                         | 17 (85.0%)                       | 59 (37.8%)                | 76 (43.2%)       |
| <b>Medications Attempted to Aid Cessation</b>                    |                                  |                           |                  |
| Varenicline                                                      | 3 (15.0%)                        | 4 (2.5%)                  | 7 (3.9%)         |
| Bupropion                                                        | 4 (20.0%)                        | 4 (2.5%)                  | 8 (4.4%)         |
| Nicotine Replacements                                            | 10 (50.0%)                       | 25 (15.5%)                | 35 (19.3%)       |

MPN: Philadelphia-negative chronic myeloproliferative neoplasms
